# Supplementary material for: Two-step warming solvothermal syntheses, luminescence and slow magnetic relaxation of isostructural dense LnMOFs based on nanoscale 3-connected linkers
Source: Royal Society of Chemistry journal article supplement (doi:10.1039/c6qi00137h), 2016-01-01
Supplement: c6qi00137h1.pdf [file c6qi00137h1.pdf]

## Supporting Information for

# Two-step warming solvothermal syntheses, luminescence and slow magnetic relaxation of isostructural dense LnMOFs based on nanoscale 3-connected linkers

Cai-Ming Liu,<sup>a,\*</sup> De-Qing Zhang,<sup>a</sup> Yong-Sheng Zhao,<sup>b</sup> Xiang Hao,<sup>a</sup> and Dao-Ben Zhu<sup>a</sup>

<sup>a</sup>*Beijing National Laboratory for Molecular Sciences, Center for Molecular Science, Key Laboratory of Organic Solids, Institute of Chemistry, Chinese Academy of Sciences, Beijing 100190, P.R. China*

<sup>b</sup>*Key Laboratory of Photochemistry, Institute of Chemistry, Chinese Academy of Sciences, Beijing 100190, P. R. China*

**Table S1.** Continuous Shape Measures calculation for the Dy(III) ion in **2**.

---

S H A P E v2.1 Continuous Shape Measures calculation  
(c) 2013 Electronic Structure Group, Universitat de Barcelona  
Contact: llunell@ub.edu

---

Dy structures

|          |        |                                            |
|----------|--------|--------------------------------------------|
| OP-8     | 1 D8h  | Octagon                                    |
| HPY-8    | 2 C7v  | Heptagonal pyramid                         |
| HBPY-8   | 3 D6h  | Hexagonal bipyramid                        |
| CU-8     | 4 Oh   | Cube                                       |
| SAPR-8   | 5 D4d  | Square antiprism                           |
| TDD-8    | 6 D2d  | Triangular dodecahedron                    |
| JGBF-8   | 7 D2d  | Johnson gyrobifastigium J26                |
| JETBPY-8 | 8 D3h  | Johnson elongated triangular bipyramid J14 |
| JBTPR-8  | 9 C2v  | Biaugmented trigonal prism J50             |
| BTPR-8   | 10 C2v | Biaugmented trigonal prism                 |

JSD-8            11 D2d    Snub diphenoïd J84  
 TT-8            12 Td     Triakis tetrahedron  
 ETBPY-8        13 D3h    Elongated trigonal bipyramid

Structure [ML8 ] OP-8    HPY-8    HBPY-8    CU-8    SAPR-8    TDD-8    JGBF-8    JETBPY-8    **JBTPR-8**    BTPR-8    JSD-8    TT-8    ETBPY-  
 8  
 ABOXIV        , 31.941, 22.824, 15.754, 11.389, 2.217, 2.236, 13.936, 26.951, **1.529**, 1.657, 3.526, 11.450, 23.937

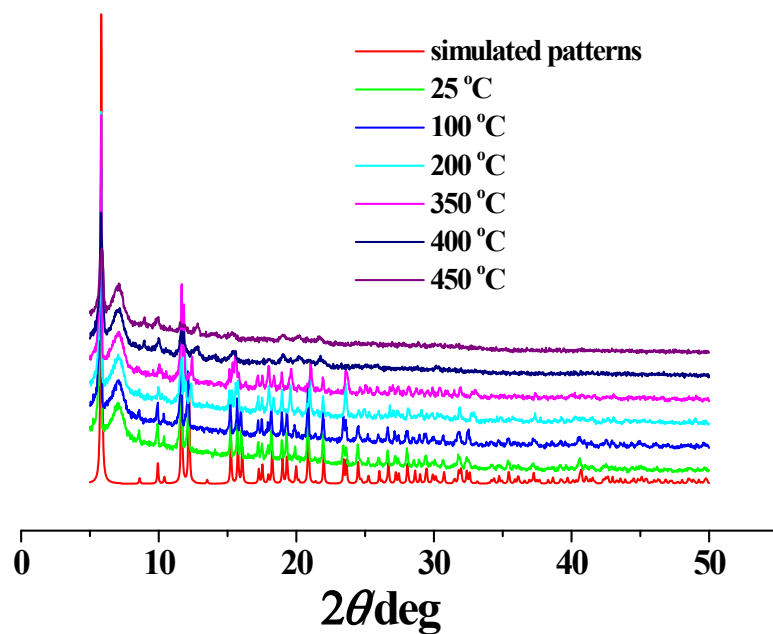

**Fig. S1.** The simulative X-ray diffraction pattern and X-ray thermodiffractogram of **1** under air from 25 to 450 °C (the broad peak at around 7° of  $2\theta$  diffraction angle comes from the background of  $\text{Al}_2\text{O}_3$ ).

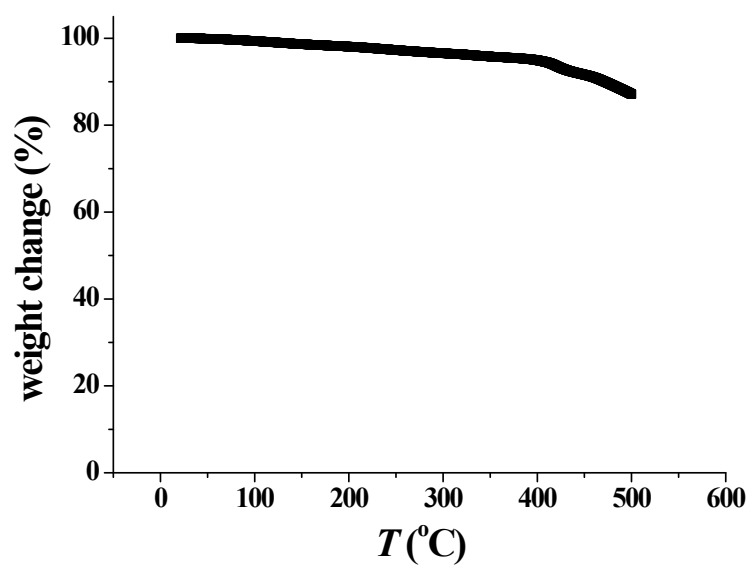

**Fig. S2.** TGA curve for complex 1.

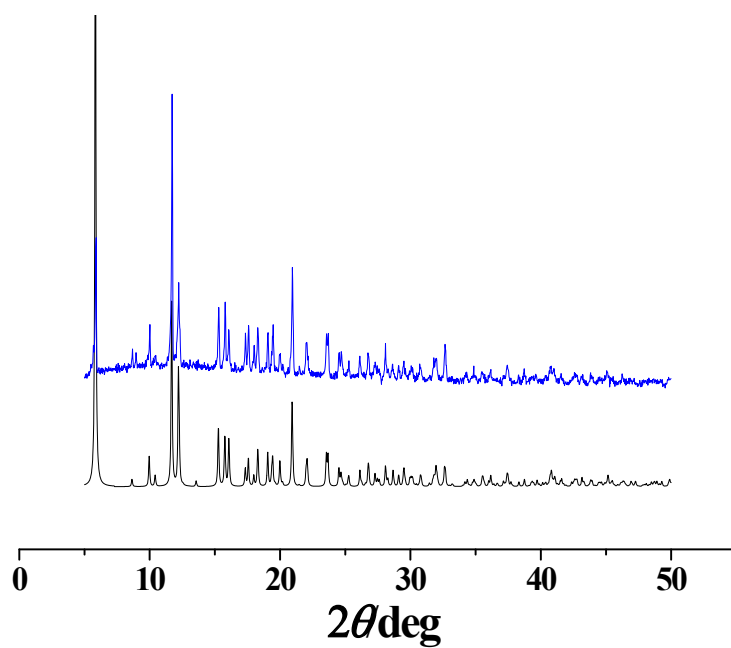

**Fig. S3.** The simulative (black) and experimental (blue, at room temperature) powder X-ray diffraction patterns for 2.

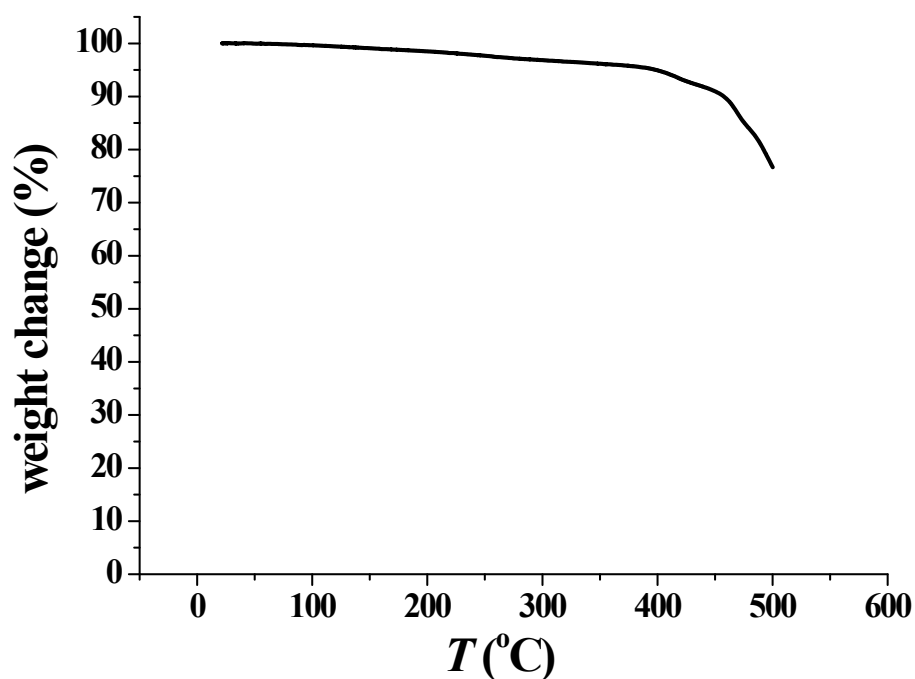

**Fig. S4.** TGA curve for complex 2.

**Table S2.** Potential void volume of LnMOFs based on the BTB<sup>3-</sup> ligand.

| Compounds                                                          | Potential void volume                                                        | Reference |
|--------------------------------------------------------------------|------------------------------------------------------------------------------|-----------|
| Tb(BTB)(H <sub>2</sub> O) · 2(C <sub>6</sub> H <sub>12</sub> O)    | $S_{\text{Langmuir}} = 1330 \text{ m}^2\text{g}^{-1}$                        | 7a        |
| Ce(BTB)(H <sub>2</sub> O)                                          | $S_{\text{Connolly}} = 1797 \text{ m}^2\text{g}^{-1}$                        | 7b        |
| La(BTB)(H <sub>2</sub> O) · 3DMF                                   | $S_{\text{Langmuir}} = 1385 \text{ m}^2\text{g}^{-1}$ ;<br>51.9% (by PLATON) | 7c        |
| [Gd(BTB)(DMSO) <sub>2</sub> ] · H <sub>2</sub> O                   | 49.8% (by PLATON)                                                            | 7d        |
| [Eu <sub>1.5</sub> (BTB) <sub>1.5</sub> (H <sub>2</sub> O)] · 3DMF | 38.5% (by PLATON)                                                            | 7e        |
| [Ln(BTB)H <sub>2</sub> O]                                          | 7.7% (by PLATON)                                                             | This work |

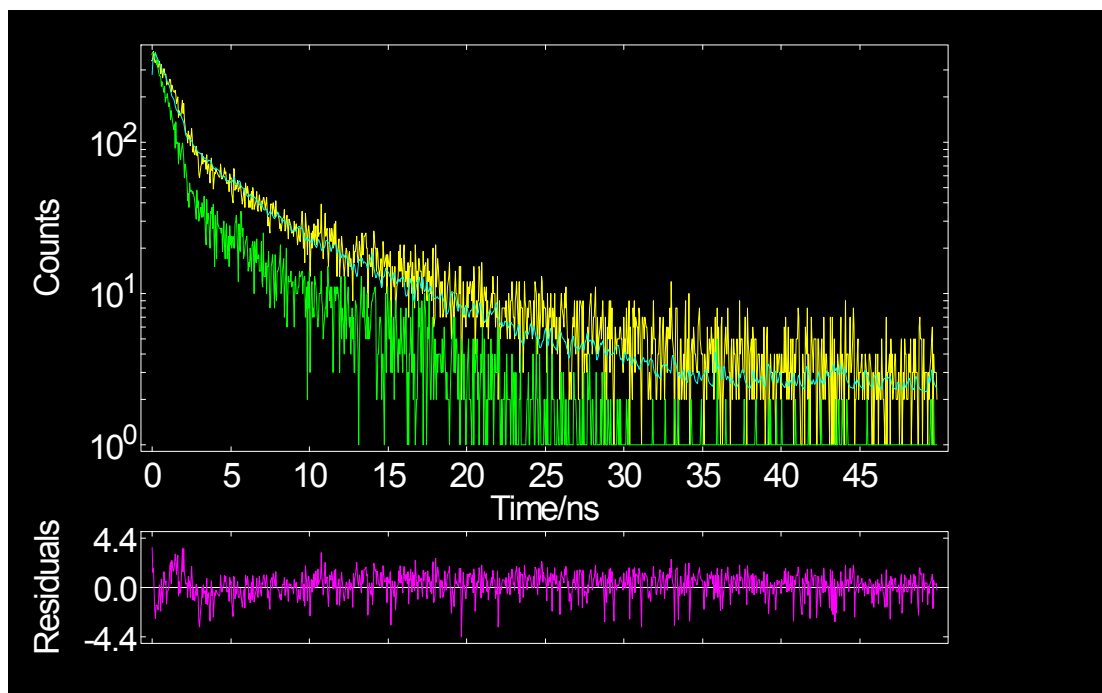

Fit Parameters

$$\text{Fit} = A + B_1 \cdot \exp(-t/\tau_1) + B_2 \cdot \exp(-t/\tau_2)$$

|          | Value     | Std Dev   |       | Value    | Std Dev  | Rel % |
|----------|-----------|-----------|-------|----------|----------|-------|
| $\tau_1$ | 2.468E-9  | 1.191E-10 | $B_1$ | 1.141E-2 | 7.932E-4 | 34.50 |
| $\tau_2$ | 1.125E-10 | 7.229E-12 | $B_2$ | 4.754E-1 | 2.658E-2 | 65.50 |
| A        | 2.134E+0  |           |       |          |          |       |

**Fig. S5.**  $^5D_0$  decay for fluorescence and fitted curves of complex **1** measured at room temperature. Emission was monitored at 612 nm and the excitation was performed at 395 nm.

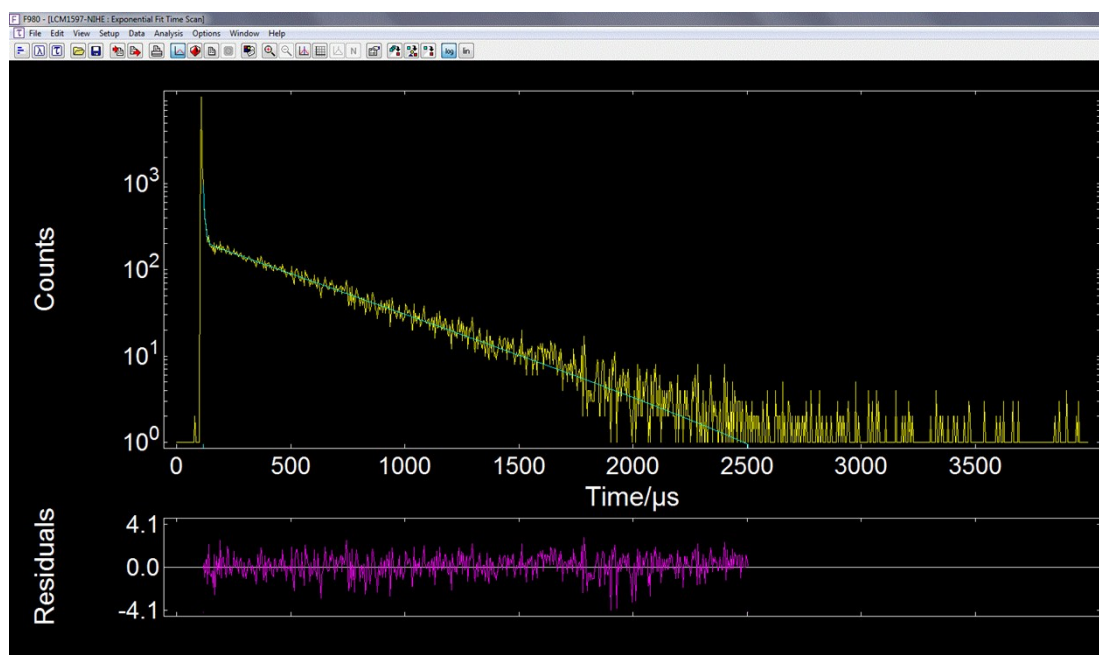

#### Fit Parameters

$$\text{Fit} = A + B_1 \cdot \exp(-t/\tau_1) + B_2 \cdot \exp(-t/\tau_2)$$

|          | Value  | Std Dev |       | Value   | Std Dev | Rel % |
|----------|--------|---------|-------|---------|---------|-------|
| $\tau_1$ | 6.40   | 0.33    | $B_1$ | 1399.25 | 341.49  | 8.49  |
| $\tau_2$ | 463.98 | 5.85    | $B_2$ | 206.80  | 9.16    | 65.50 |
| A        | -0.615 |         |       |         |         |       |

**Fig. S6.**  $^5D_0$  decay for phosphorescence and fitted curves of complex **1** measured at room temperature. Emission was monitored at 612 nm and the excitation was performed at 395 nm.

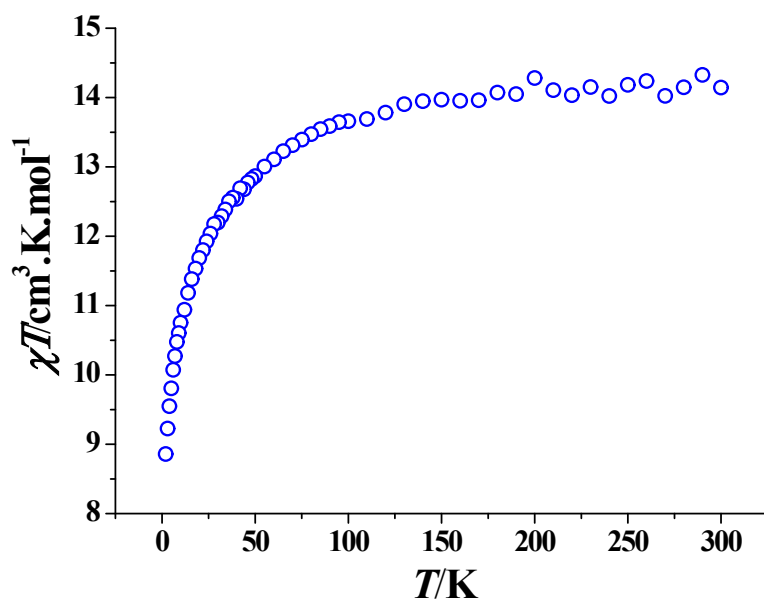

Fig. S7.  $\chi T$  versus  $T$  plot of 2.

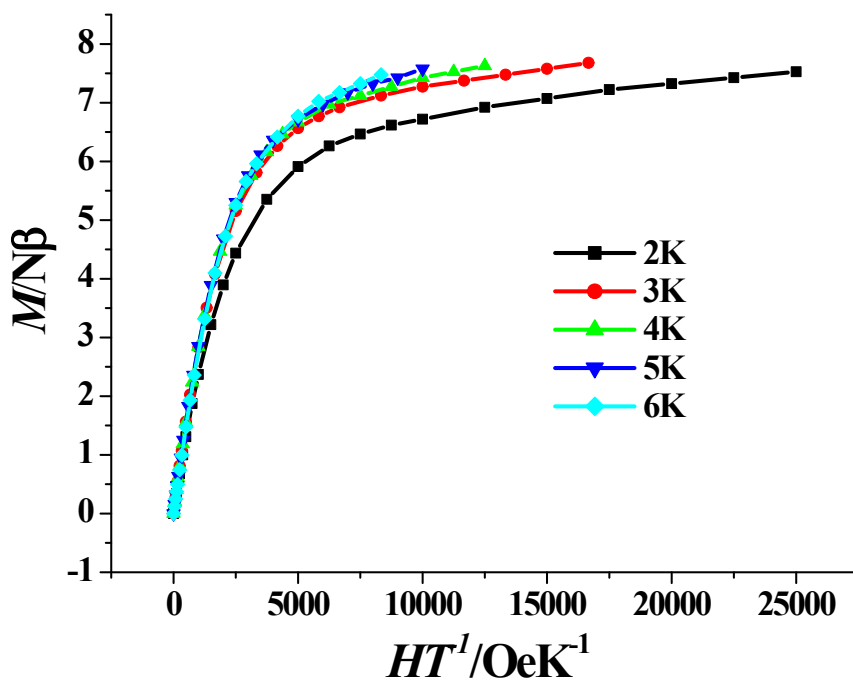

Fig. S8.  $M$  versus  $H/T$  plots at 2–6 K of 2.

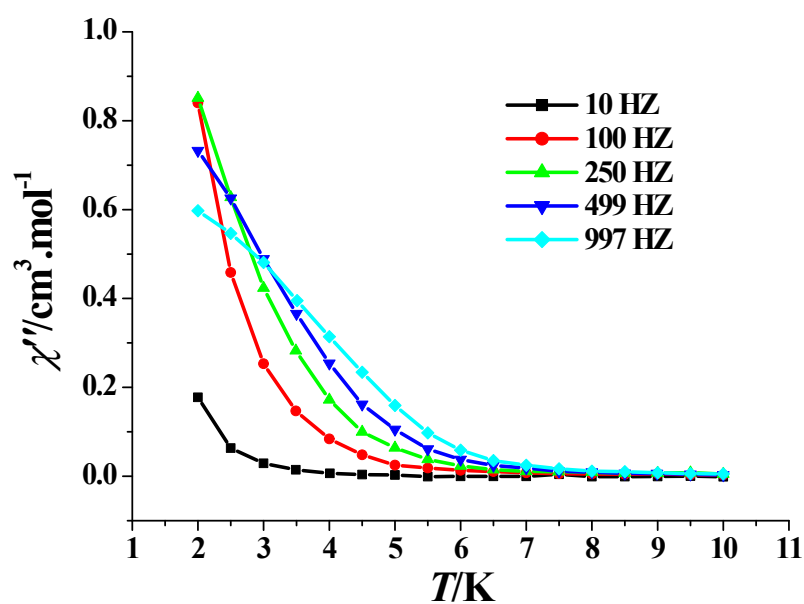

**Fig. S9.**  $\chi''$  versus  $T$  plots measured in a 2.5 Oe ac magnetic field with a zero dc field for **2**.

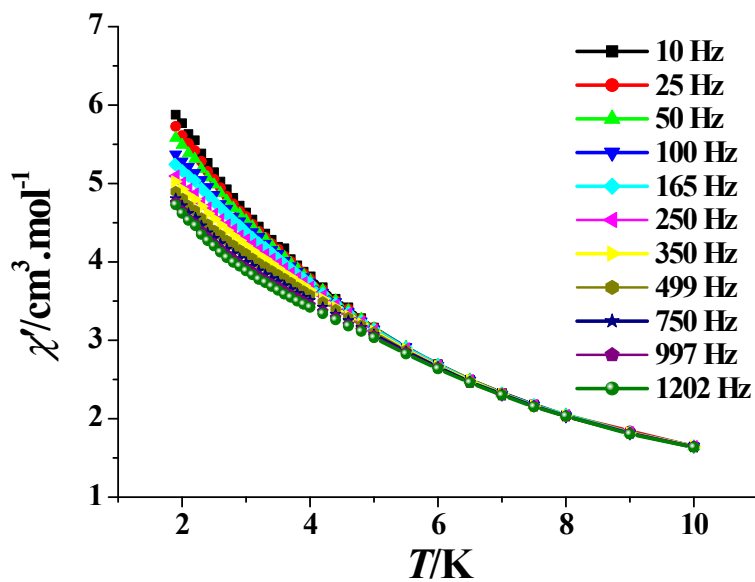

**Fig. S10.**  $\chi'$  versus  $T$  plots measured in a 2.5 Oe ac magnetic field with a 1000 Oe dc field for **2**.



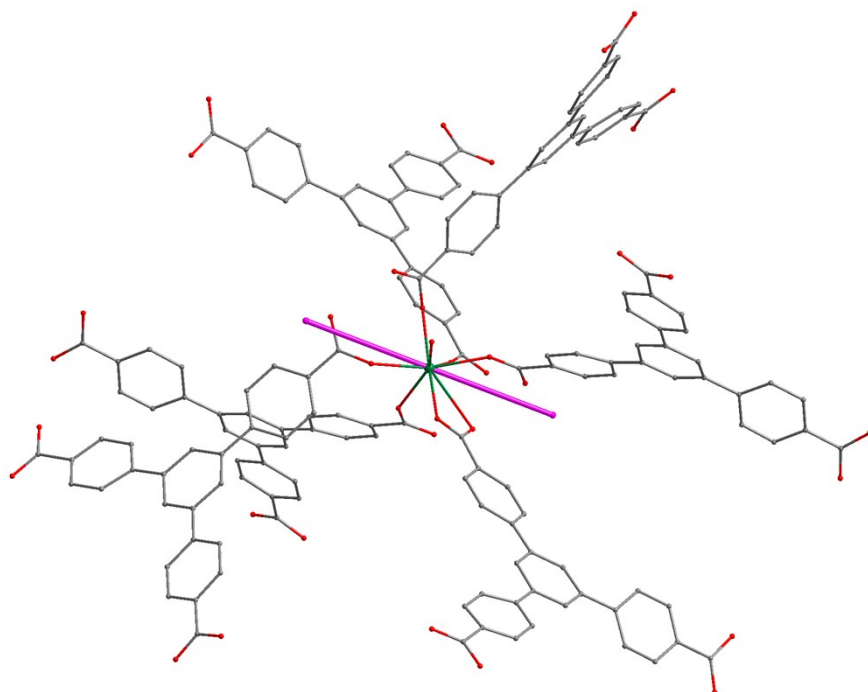

**Fig. S11.** Magnetic axis of the Dy<sup>3+</sup> ion in **2** calculated by an electrostatic method.

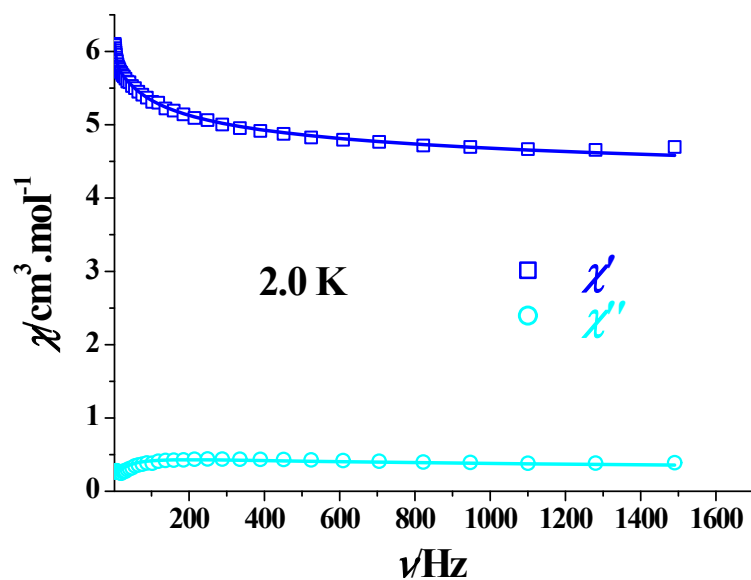

**Fig. S12.** Frequency dependence of the in-phase ( $\chi'$ , top) and out-of-phase ( $\chi''$ , bottom) ac susceptibility of **2** at 2.0 K. the solid lines represent the best fitting with the sum of two modified Debye functions.

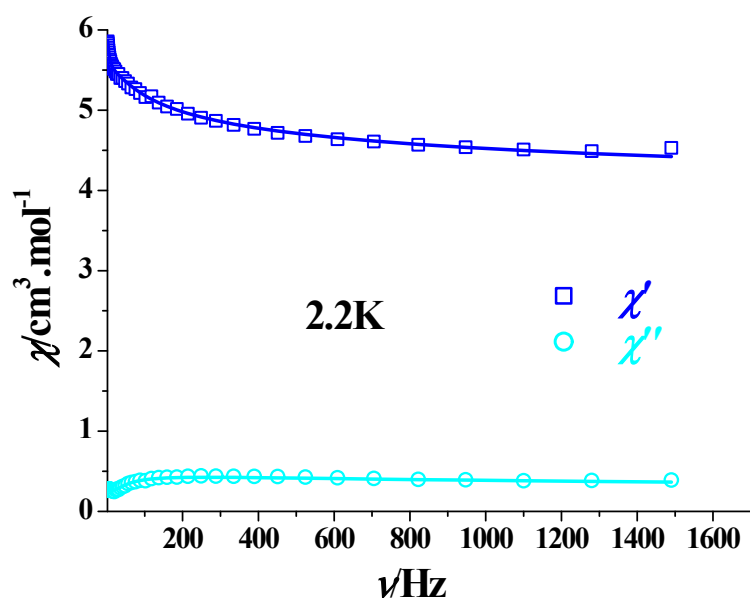

**Fig. S13.** Frequency dependence of the in-phase ( $\chi'$ , top) and out-of-phase ( $\chi''$ , bottom) ac susceptibility of **2** at 2.2 K. the solid lines represent the best fitting with the sum of two modified Debye functions.

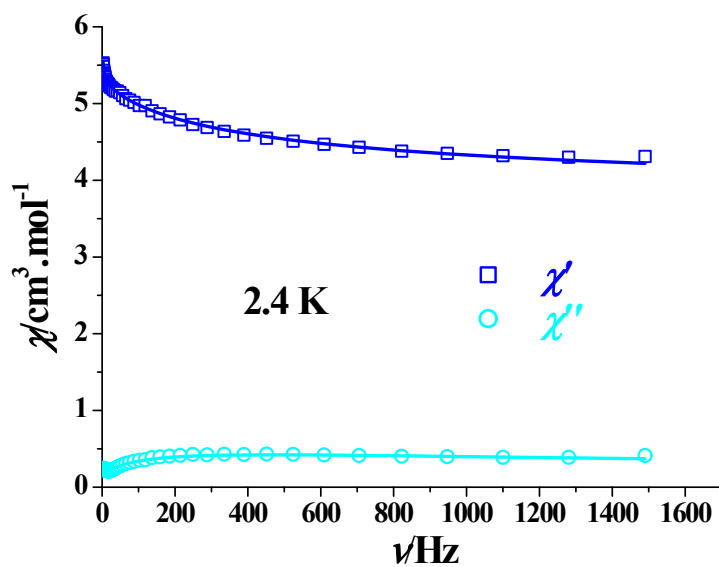

**Fig. S14.** Frequency dependence of the in-phase ( $\chi'$ , top) and out-of-phase ( $\chi''$ , bottom) ac susceptibility of **2** at 2.4 K. the solid lines represent the best fitting with the sum of two modified Debye functions.

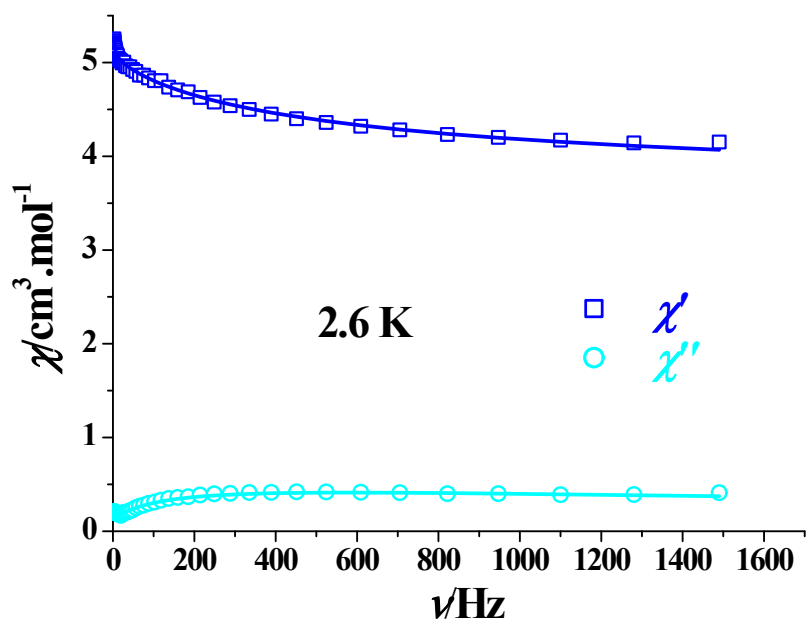

**Fig. S15.** Frequency dependence of the in-phase ( $\chi'$ , top) and out-of-phase ( $\chi''$ , bottom) ac susceptibility of **2** at 2.6 K. the solid lines represent the best fitting with the sum of two modified Debye functions.

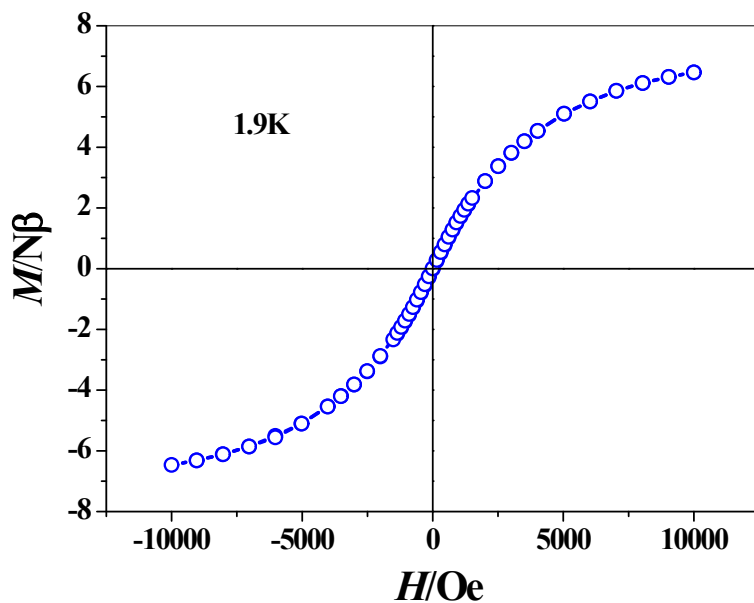

**Fig. S16.** Plot of  $M$  versus  $H$  at 1.9 K from  $-10000$  to  $10000$  Oe for **2**.

**Table S3.** Linear combination of two modified Debye model fitting parameters at 2.0-2.6 K of **2** under 1 kOe dc field.

| $T(\text{K})$ | $\chi_2(\text{cm}^3.\text{mol}^{-1})$ | $\chi_1(\text{cm}^3.\text{mol}^{-1})$ | $\chi_0(\text{cm}^3.\text{mol}^{-1})$ | $\tau_1(\text{s})$ | $\alpha_1$ | $\tau_2(\text{s})$ | $\alpha_2$ |
|---------------|---------------------------------------|---------------------------------------|---------------------------------------|--------------------|------------|--------------------|------------|
| 2.0           | 6.8539                                | 3.44511                               | 3.71894                               | 0.008              | 1.863E-7   | 0.00204            | 0.65798    |
| 2.2           | 6.46216                               | 3.24677                               | 3.56324                               | 0.00669            | 0.00019    | 0.00145            | 0.64117    |
| 2.4           | 5.75198                               | 4.02202                               | 3.68468                               | 0.05961            | 0.00006    | 0.00033            | 0.42496    |
| 2.6           | 5.49167                               | 3.89797                               | 3.54221                               | 0.06924            | 0.03696    | 0.00027            | 0.39353    |

The sum of two modified Debye functions:

$$\chi_{ac}(\omega) = \frac{\chi_2 - \chi_1}{1 + (i\omega\tau_2)^{(1-\alpha_2)}} + \frac{\chi_1 - \chi_0}{1 + (i\omega\tau_1)^{(1-\alpha_1)}} + \chi_0 \quad (1)$$

$$\chi' = \frac{(\chi_2 - \chi_1)[1 + (\omega\tau_2)^{1-\alpha_2} \sin 1/2\alpha_2\pi]}{1 + 2(\omega\tau_2)^{(1-\alpha_2)} \sin 1/2\alpha_2\pi + (\omega\tau_2)^{2(1-\alpha_2)}} + \frac{(\chi_1 - \chi_0)[1 + (\omega\tau_1)^{1-\alpha_1} \sin 1/2\alpha_1\pi]}{1 + 2(\omega\tau_1)^{(1-\alpha_1)} \sin 1/2\alpha_1\pi + (\omega\tau_1)^{2(1-\alpha_1)}} + \chi_0 \quad (2)$$

$$\chi'' = \frac{(\chi_2 - \chi_1)[(\omega\tau_2)^{1-\alpha_2} \cos 1/2\alpha_2\pi]}{1 + 2(\omega\tau_2)^{(1-\alpha_2)} \sin 1/2\alpha_2\pi + (\omega\tau_2)^{2(1-\alpha_2)}} + \frac{(\chi_1 - \chi_0)[(\omega\tau_1)^{1-\alpha_1} \cos 1/2\alpha_1\pi]}{1 + 2(\omega\tau_1)^{(1-\alpha_1)} \sin 1/2\alpha_1\pi + (\omega\tau_1)^{2(1-\alpha_1)}} + \chi_0 \quad (3)$$
